# Supplementary material
Source: MDPI journal article supplement (https://www.mdpi.com/2073-4344/12/8/840)
Supplement: s1 [file s1]

# Pyrolysis of Biomass Pineapple Residue and Banana Pseudo-Stem: Kinetics, Mechanism and Valorization of Bio-Char

Xin Wang <sup>1,\*</sup>, Shuo Yang <sup>1</sup>, Boxiong Shen <sup>2,\*</sup>, Jiancheng Yang <sup>1</sup> and Lianfei Xu <sup>1</sup>

<sup>1</sup> Tianjin Key Laboratory of Clean Energy and Pollution Control, School of Energy and Environmental Engineering, Hebei University of Technology, Tianjin 300401, China; yangshuonh@126.com (S.Y.); yangjch1023@hebut.edu.cn (J.Y.); xulianfei2006@126.com (L.X.)

<sup>2</sup> School of Chemical Engineering, Hebei University of Technology, Tianjin 300401, China

\* Correspondence: Author: wangxinnh@hebut.edu.cn (X.W.); shenbx@hebut.edu.cn (B.S.); Tel.022-60435279 (X.W.); Fax: 022-60435279 (X.W.)

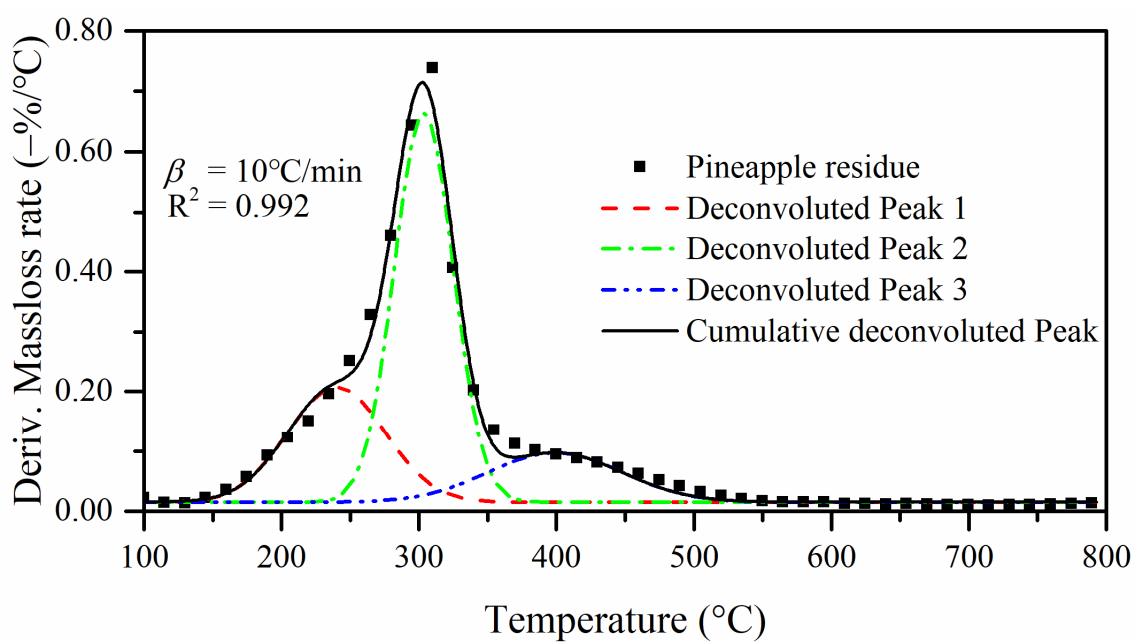

Figure S1. Peak deconvolution of DTG curves of pineapple residue at a heating rate of  $10^{\circ}\text{C}/\text{min}$ .

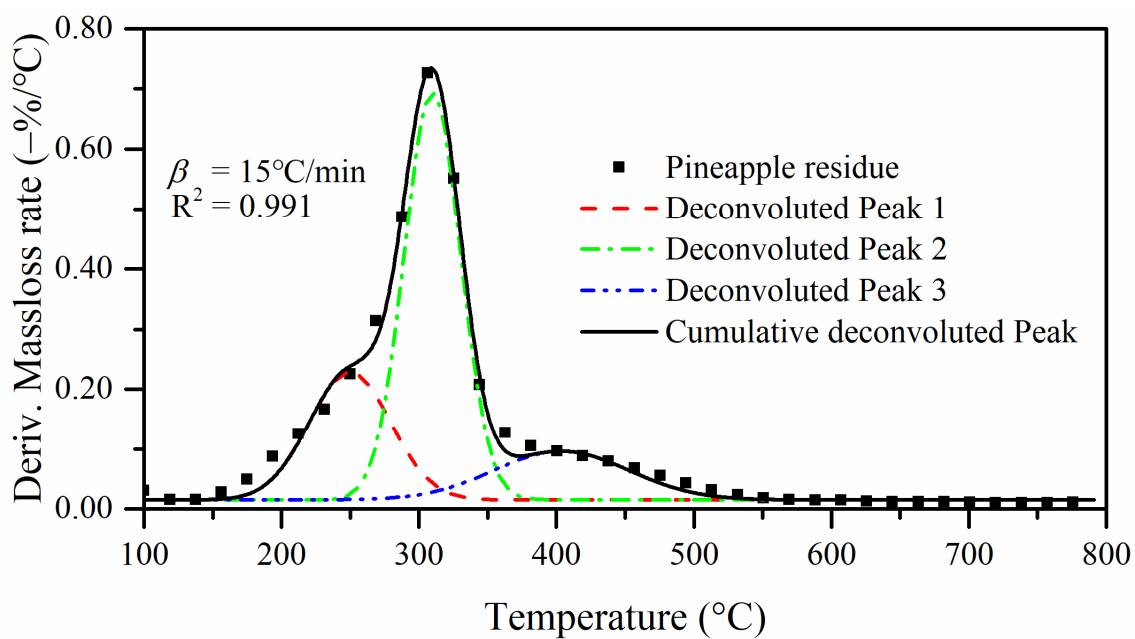

Figure S2. Peak deconvolution of DTG curves of pineapple residue at a heating rate of  $15^{\circ}\text{C}/\text{min}$

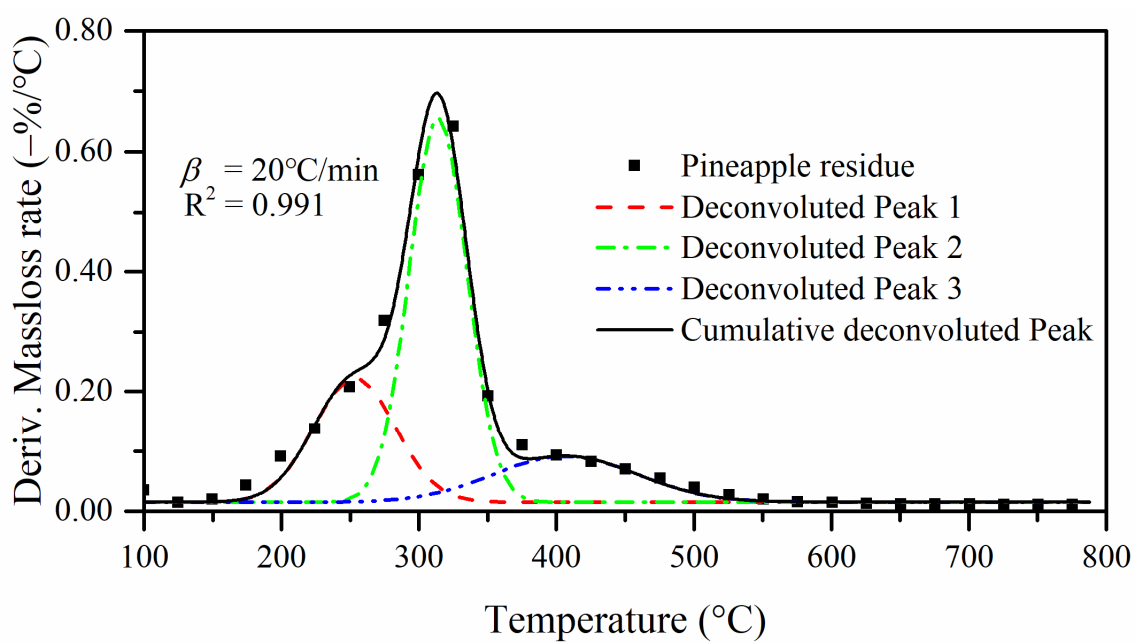

Figure S3. Peak deconvolution of DTG curves of pineapple residue at a heating rate of  $20^{\circ}\text{C}/\text{min}$

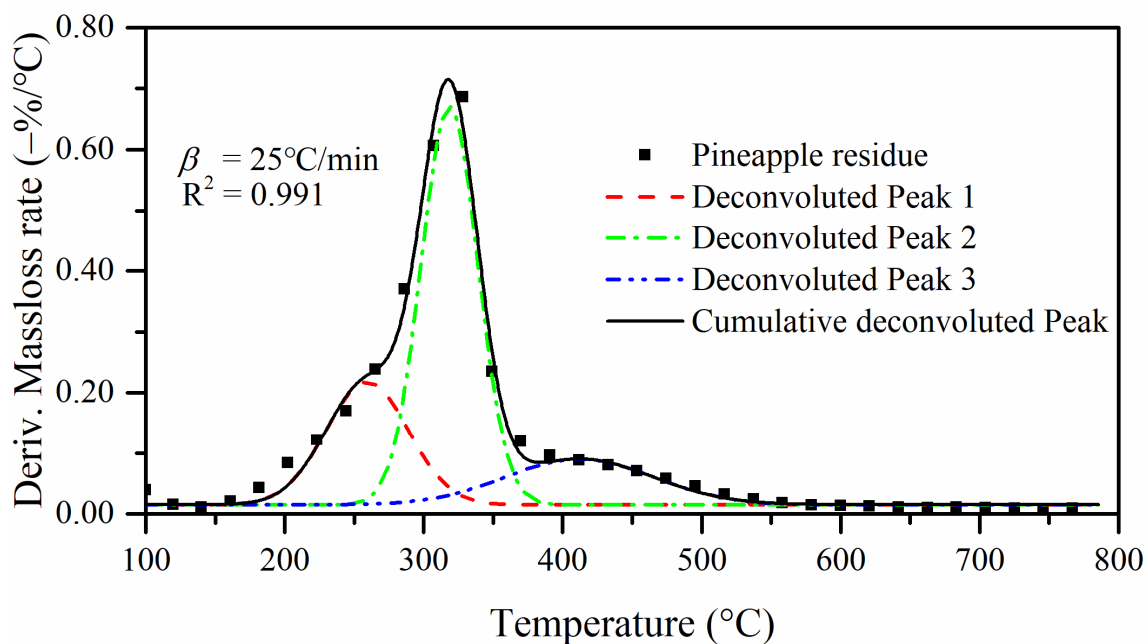

Figure S4. Peak deconvolution of DTG curves of pineapple residue at a heating rate of  $25^{\circ}\text{C}/\text{min}$

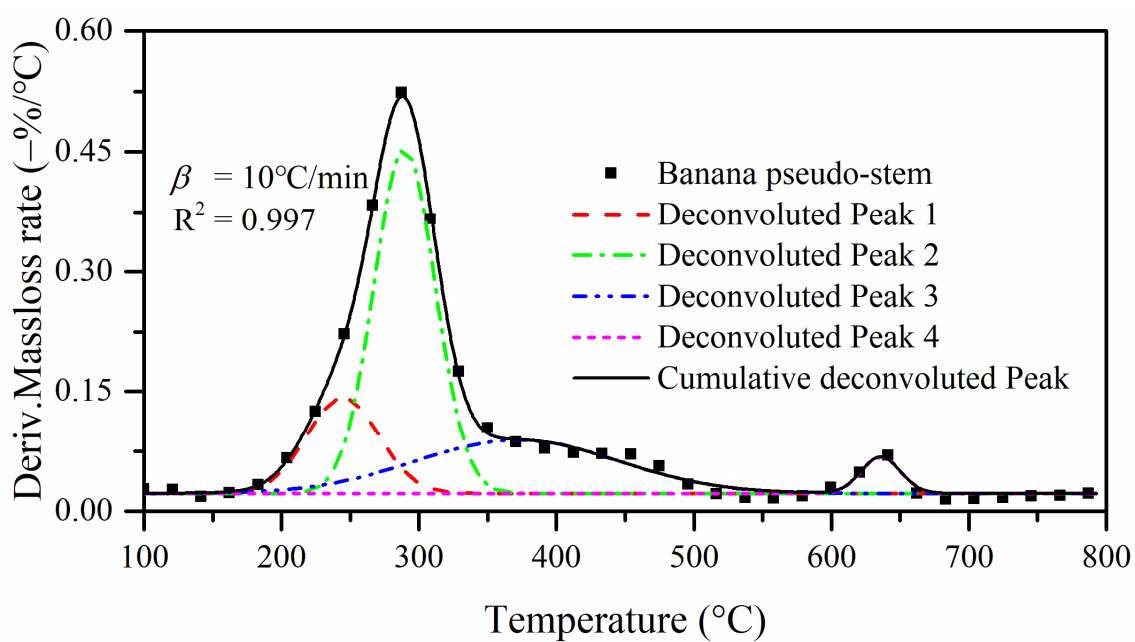

Figure S5. Peak deconvolution of DTG curves of banana pseudo-stem at a heating rate of  $10^{\circ}\text{C}/\text{min}$

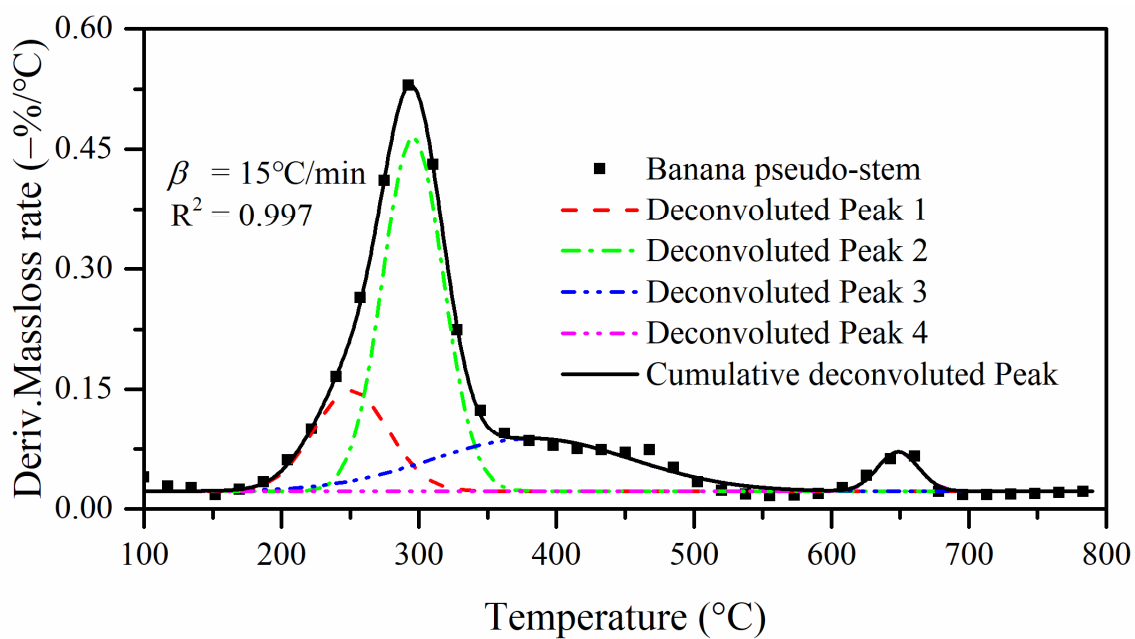

Figure S6. Peak deconvolution of DTG curves of banana pseudo-stem at a heating rate of  $15^{\circ}\text{C}/\text{min}$

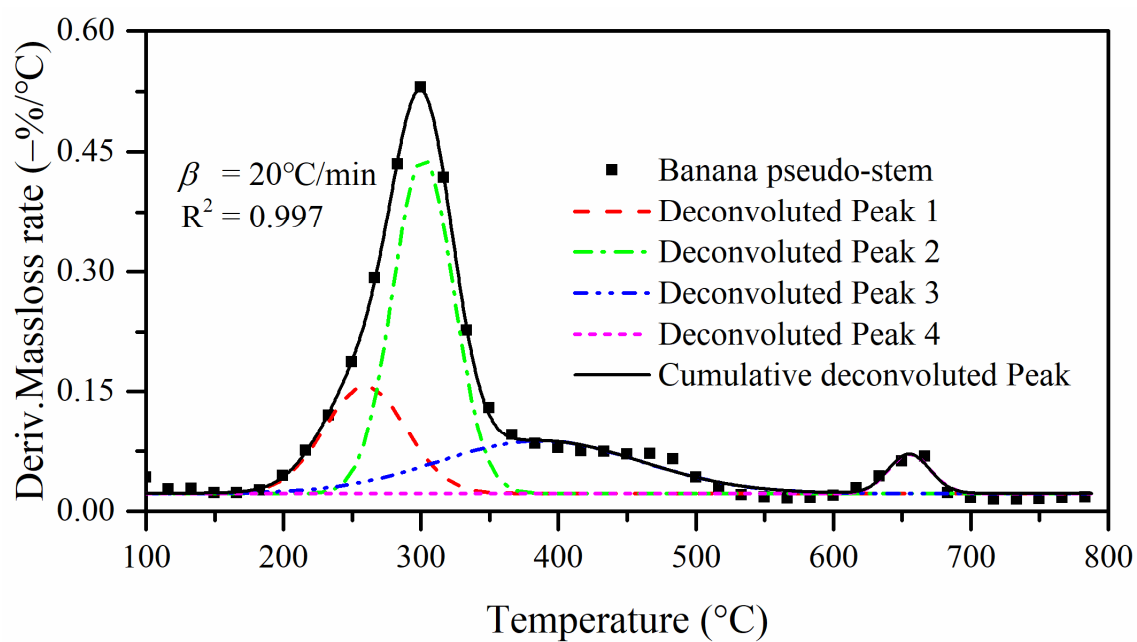

Figure S7. Peak deconvolution of DTG curves of banana pseudo-stem at a heating rate of  $20^{\circ}\text{C}/\text{min}$

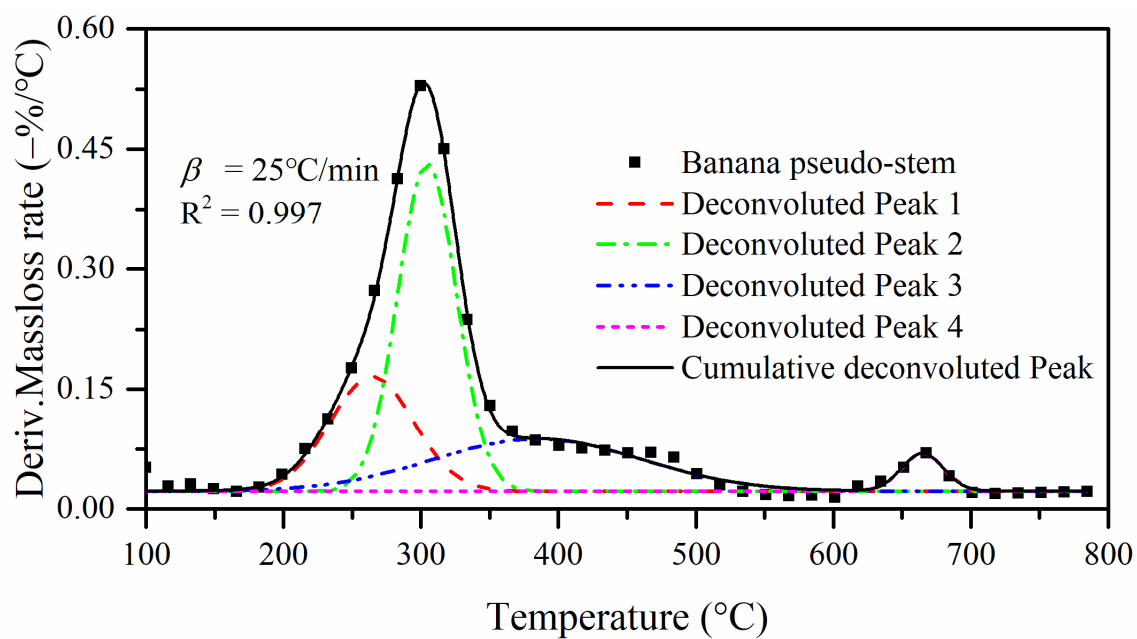

Figure S8. Peak deconvolution of DTG curves of banana pseudo-stem at a heating rate of  $25^{\circ}\text{C}/\text{min}$

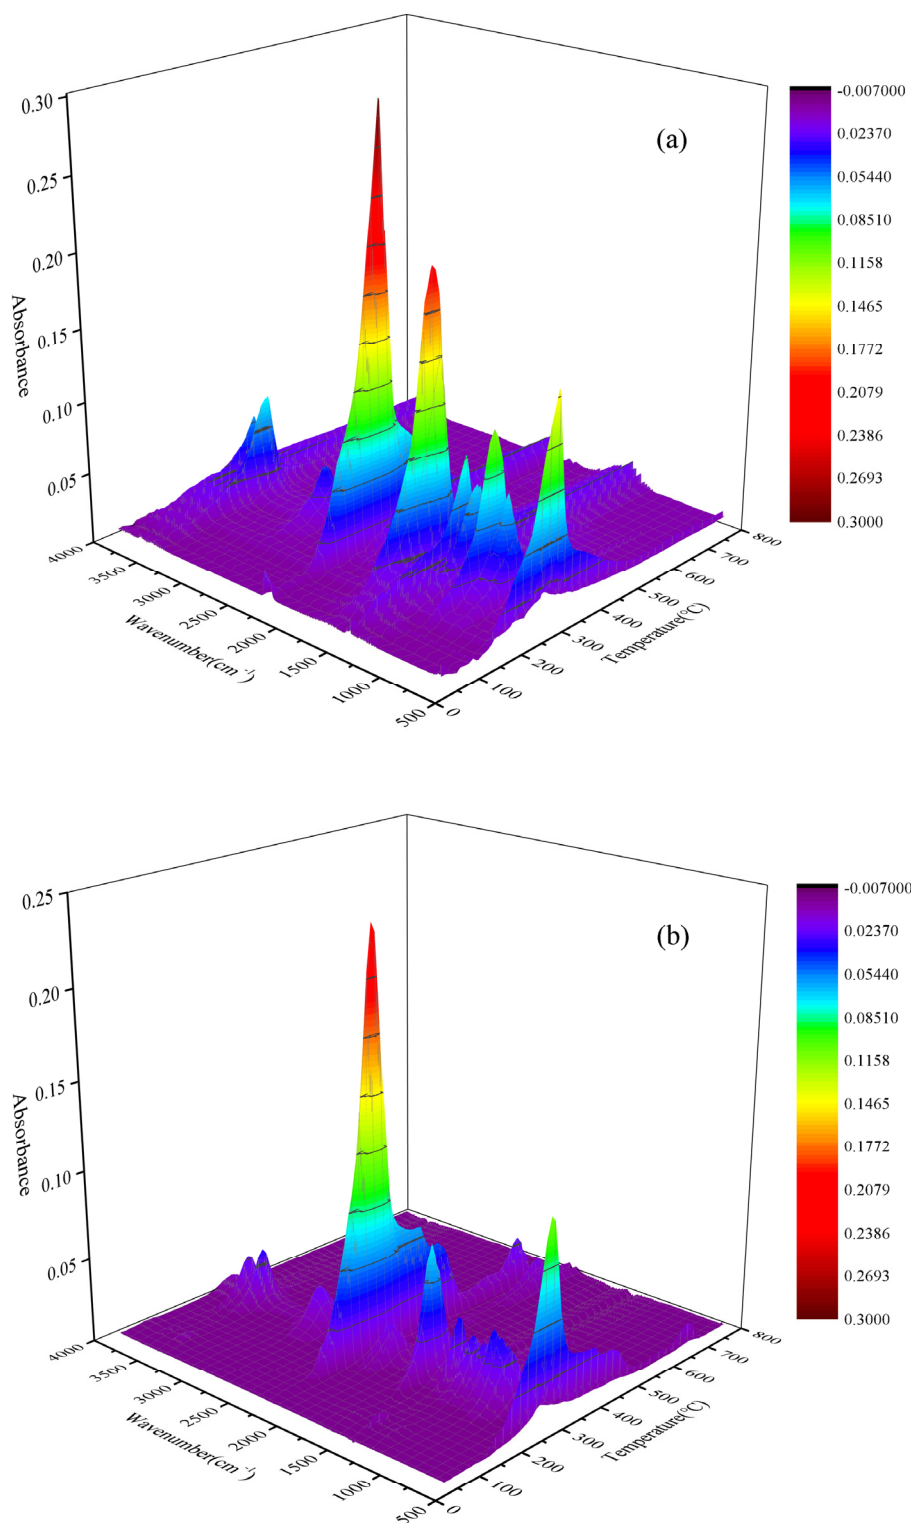

Figure S9. Three-dimensional FTIR distribution of evolved gas during pyrolysis ((a) pineapple residue and (b) banana pseudo-stem)

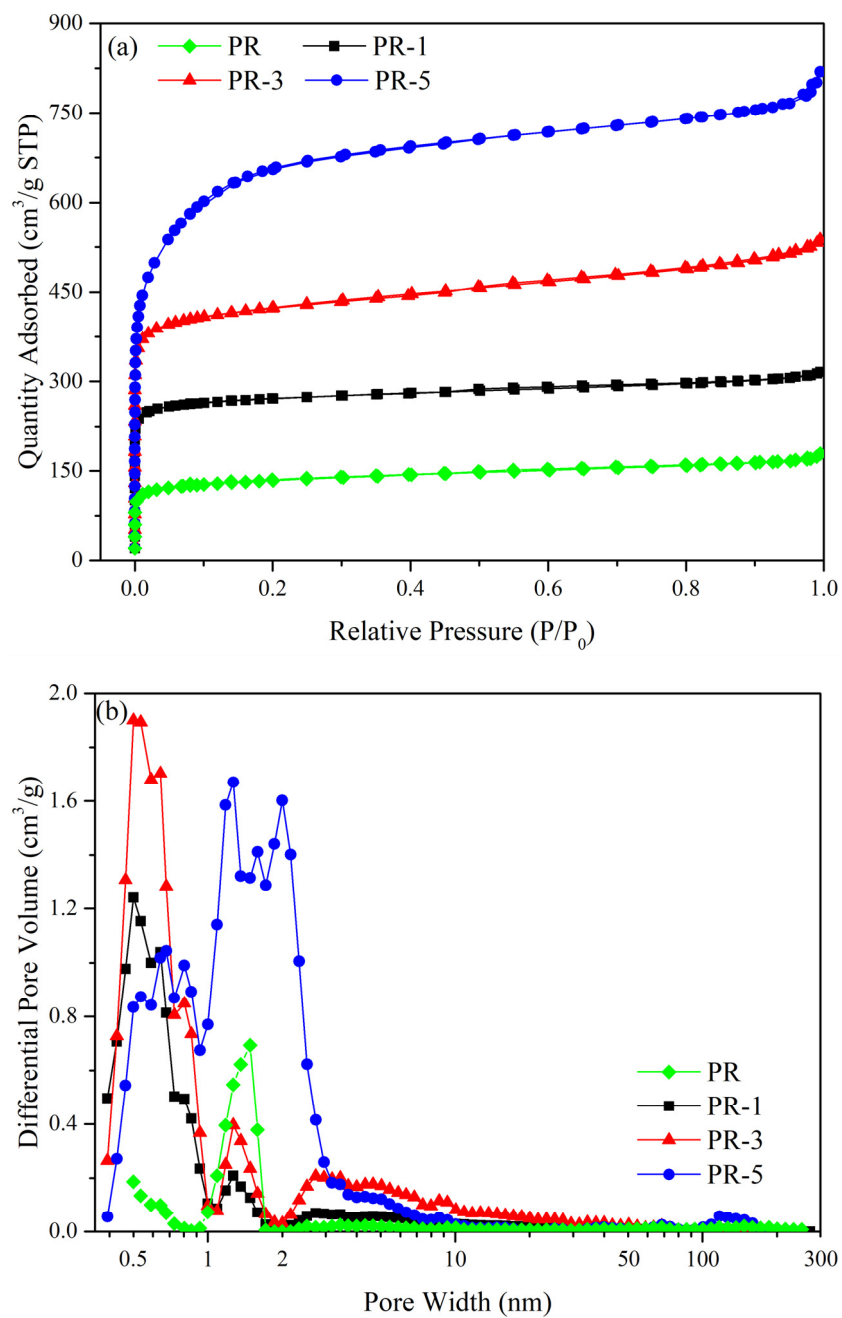

Figure S10. (a) N<sub>2</sub> adsorption-desorption isotherms and (b) pore distribution of biochars and porous carbons sourced from pineapple residue

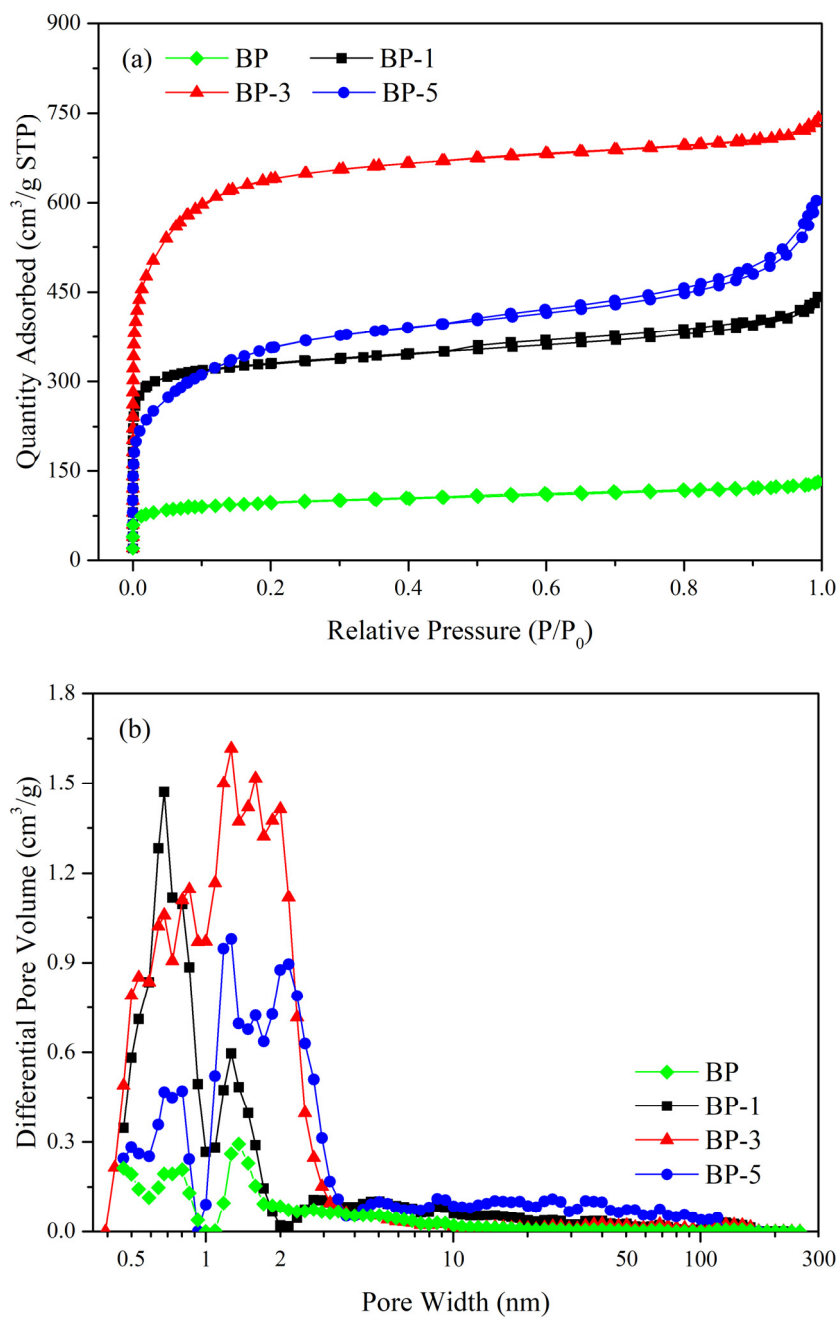

Figure S11. (a) N<sub>2</sub> adsorption-desorption isotherms and (b) pore distribution of biochars and porous carbons sourced from banana pseudo-stems

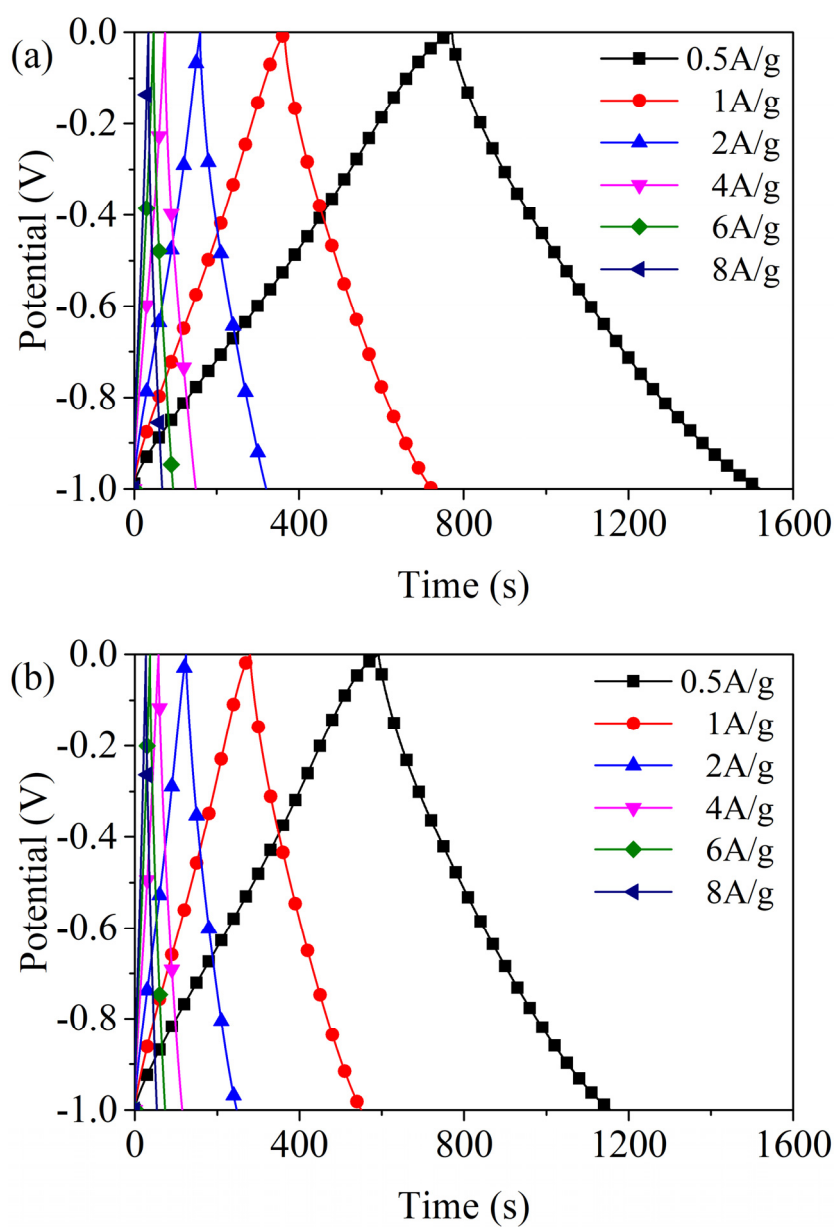

Figure S12. Galvanostatic charge/discharge (GCD) curves of (a) PR-5 and (b) BP-3 at different current densities

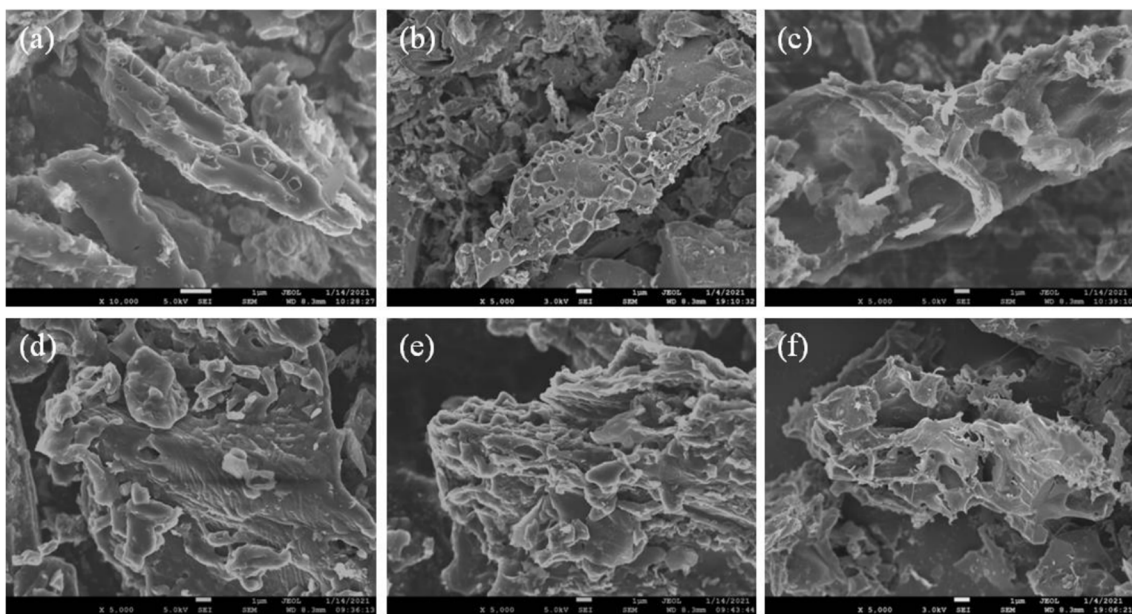

Figure S13. SEM images of porous carbon sourced from pineapple residue and banana pseudo-stem (a) BP-1; (b) BP-3; (c) BP-5; (d) PR-1; (e) PR-3; (f) PR-5

**Table S1. Pyrolysis mechanism function**

| No. | Function Name                  | Mechanism                                                                                                                 | $f(\alpha)$                                                                          |
|-----|--------------------------------|---------------------------------------------------------------------------------------------------------------------------|--------------------------------------------------------------------------------------|
| 1   | Parabolic Law                  | One-dimensional diffusion, 1D, D <sub>1</sub> , Deceleration shaped $\alpha$ - $t$ curves                                 | $\frac{1}{2}\alpha^{-1}$                                                             |
| 2   | Valensi Equation               | Two-dimensional diffusion, Cylindrical symmetry, 2D, D <sub>2</sub> , Deceleration shaped $\alpha$ - $t$ curves           | $[-\ln(1-\alpha)]^{-1}$                                                              |
| 3   | Jander Equation                | Two-dimensional diffusion, 2D, $n=1/2$                                                                                    | $4(1-\alpha)^{\frac{1}{2}} \left[ 1-(1-\alpha)^{\frac{1}{2}} \right]^{-1}$           |
| 4   | Jander Equation                | Two-dimensional diffusion, 2D, $n=2$                                                                                      | $(1-\alpha)^{\frac{1}{2}} \left[ 1-(1-\alpha)^{\frac{1}{2}} \right]^{-1}$            |
| 5   | Jander Equation                | Three-dimensional diffusion, 3D, $n=1/2$                                                                                  | $6(1-\alpha)^{\frac{2}{3}} \left[ 1-(1-\alpha)^{\frac{1}{3}} \right]^{\frac{1}{2}}$  |
| 6   | Jander Equation                | Three-dimensional diffusion, Spherically symmetric, 3D, D <sub>3</sub> , Deceleration shaped $\alpha$ - $t$ curves, $n=2$ | $\frac{3}{2}(1-\alpha)^{\frac{2}{3}} \left[ 1-(1-\alpha)^{\frac{1}{3}} \right]^{-1}$ |
| 7   | Ginstling-Brounshtein Equation | Three-dimensional diffusion, Spherically symmetric, 3D, D <sub>4</sub> , Deceleration shaped $\alpha$ - $t$ curves        | $\frac{3}{2} \left[ (1-\alpha)^{\frac{1}{3}} - 1 \right]^{-1}$                       |

|    |                                     |                                                                                                                                    |                                                                                   |
|----|-------------------------------------|------------------------------------------------------------------------------------------------------------------------------------|-----------------------------------------------------------------------------------|
| 8  | Anti-Jander Equation                | Three-dimensional diffusion, 3D                                                                                                    | $\frac{3}{2}(1+\alpha)^{\frac{2}{3}}\left[(1+\alpha)^{\frac{1}{3}}-1\right]^{-1}$ |
|    | Z.-L.-T. Equation                   | Three-dimensional diffusion, 3D                                                                                                    | $\frac{3}{2}(1-\alpha)^{\frac{4}{3}}\left[(1-\alpha)^{\frac{1}{3}}-1\right]^{-1}$ |
| 10 | Avrami-Erofeev Equation             | Random nucleation and subsequent growth, A4, S-shaped $\alpha$ -t curves                                                           | $4(1-\alpha)\left[-\ln(1-\alpha)\right]^{\frac{3}{4}}$                            |
| 11 | Avrami-Erofeev Equation             | Random nucleation and subsequent growth, A3, S-shaped $\alpha$ -t curves, $n = 1/3, m=3$                                           | $3(1-\alpha)\left[-\ln(1-\alpha)\right]^{\frac{2}{3}}$                            |
| 12 | Avrami-Erofeev Equation             | Random nucleation and subsequent growth, $n=2/5$                                                                                   | $\frac{5}{2}(1-\alpha)\left[-\ln(1-\alpha)\right]^{\frac{3}{5}}$                  |
| 13 | Avrami-Erofeev Equation             | Random nucleation and subsequent growth, A2, S-shaped $\alpha$ -t curves, $n=1/2, m=2$                                             | $2(1-\alpha)\left[-\ln(1-\alpha)\right]^{\frac{1}{2}}$                            |
| 14 | Avrami-Erofeev Equation             | Random nucleation and subsequent growth, $n=2/3$                                                                                   | $\frac{3}{2}(1-\alpha)\left[-\ln(1-\alpha)\right]^{\frac{1}{3}}$                  |
| 15 | Avrami-Erofeev Equation             | Random nucleation and subsequent growth, $n=3/4$                                                                                   | $\frac{4}{3}(1-\alpha)\left[-\ln(1-\alpha)\right]^{\frac{1}{4}}$                  |
| 16 | Mamle Single-line rule, first order | Random nucleation and subsequent growth, Assuming each particle has only one core, A1, F1, S-shaped $\alpha$ -t curves, $n=1, m=1$ | $1-\alpha$                                                                        |
| 17 | Avrami-Erofeev Equation             | Random nucleation and subsequent growth, $n=3/2$                                                                                   | $\frac{2}{3}(1-\alpha)\left[-\ln(1-\alpha)\right]^{-\frac{1}{2}}$                 |
| 18 | Avrami-Erofeev Equation             | Random nucleation and subsequent growth, $n=2$                                                                                     | $\frac{1}{2}(1-\alpha)\left[-\ln(1-\alpha)\right]^{-1}$                           |

|    |                               |                                                                                                        |                                               |
|----|-------------------------------|--------------------------------------------------------------------------------------------------------|-----------------------------------------------|
| 19 | Avrami-Erofeev Equation       | Random nucleation and subsequent growth, $n=3$                                                         | $\frac{1}{3}(1-\alpha)[- \ln(1-\alpha)]^{-2}$ |
| 20 | Avrami-Erofeev Equation       | Random nucleation and subsequent growth, $n=4$                                                         | $\frac{1}{4}(1-\alpha)[- \ln(1-\alpha)]^{-3}$ |
| 21 | P.-T. Equation                | Autocatalytic reaction, Dendritic nucleation, Au, B1<br>(S-shaped $\alpha$ -t curves)                  | $\alpha(1-\alpha)$                            |
| 22 | Mampel Power Law              | $n=1/4$                                                                                                | $4\alpha^{\frac{3}{4}}$                       |
| 23 | Mampel Power Law              | $n=1/3$                                                                                                | $3\alpha^{\frac{2}{3}}$                       |
| 24 | Mampel Power Law              | $n=1/2$                                                                                                | $2\alpha^{\frac{1}{2}}$                       |
| 25 | Mampel Power Law              | Phase boundary reaction (One-dimensional), R1,<br>$n=1$                                                | 1                                             |
| 26 | Mampel Power Law              | $n = \frac{3}{2}$                                                                                      | $\frac{2}{3}\alpha^{-\frac{1}{2}}$            |
| 27 | Mampel Power Law              | $n=2$                                                                                                  | $\frac{1}{2}\alpha^{-1}$                      |
| 28 | Reaction order                | $n=1/4$                                                                                                | $4(1-\alpha)^{\frac{3}{4}}$                   |
| 29 | Contraction globular (Volume) | Phase boundary reaction, Spherically symmetric,<br>R3, Deceleration shaped $\alpha$ -t curves, $n=1/4$ | $3(1-\alpha)^{\frac{2}{3}}$                   |
| 30 |                               | $n=3$ (Three-dimensional)                                                                              | $(1-\alpha)^{\frac{2}{3}}$                    |

|    |                                    |                                                                                                       |                              |
|----|------------------------------------|-------------------------------------------------------------------------------------------------------|------------------------------|
| 31 | Contraction of the cylinder (Area) | Phase boundary reaction, Cylindrical symmetry, R2, Deceleration shaped $\alpha$ - $t$ curves, $n=1/2$ | $2(1-\alpha)^{\frac{1}{2}}$  |
| 32 |                                    | $n=2$ (Two-dimensional)                                                                               | $(1-\alpha)^{\frac{1}{2}}$   |
| 33 | Reaction order                     | $n=2$                                                                                                 | $\frac{1}{2}(1-\alpha)^{-1}$ |
| 34 | Reaction order                     | $n=3$                                                                                                 | $\frac{1}{3}(1-\alpha)^{-2}$ |
| 35 | Reaction order                     | $n=4$                                                                                                 | $\frac{1}{4}(1-\alpha)^{-3}$ |
| 36 | Two order                          | Chemical reaction, F2, Deceleration shaped $\alpha$ - $t$ curves                                      | $(1-\alpha)^2$               |
| 37 | 2/3 order                          | Chemical reaction                                                                                     | $2(1-\alpha)^{\frac{3}{2}}$  |
| 38 | Exponential Law                    | E1, $n=1$ , Accelerated shaped $\alpha$ - $t$ curves                                                  | $\alpha$                     |
| 39 | Exponential Law                    | $n=2$                                                                                                 | $\frac{1}{2}\alpha$          |
| 40 | Three order                        | Chemical reaction, F3, Deceleration shaped $\alpha$ - $t$ curves                                      | $\frac{1}{2}(1-\alpha)^3$    |

**Table S2. Pyrolysis thermodynamic parameters of the deconvoluted peaks**

| Deconvoluted peaks | Peak temperature<br>(°C) | Enthalpy<br>$\Delta H$<br>(kJ/mol) | Gibbs free energy<br>$\Delta G$<br>(kJ/mol) | Entropy<br>$\Delta S$<br>(J/mol) |
|--------------------|--------------------------|------------------------------------|---------------------------------------------|----------------------------------|
| Pineapple residue  |                          |                                    |                                             |                                  |
| 1                  | 233                      | 135                                | 127                                         | 16                               |
| 2                  | 294                      | 182                                | 132                                         | 88                               |
| 3                  | 385                      | 270                                | 170                                         | 153                              |
| Banana pseudo-stem |                          |                                    |                                             |                                  |
| 1                  | 232                      | 170                                | 134                                         | 72                               |
| 2                  | 278                      | 171                                | 132                                         | 70                               |
| 3                  | 359                      | 275                                | 172                                         | 163                              |
| 4                  | 618                      | 357                                | 210                                         | 165                              |

**Table S3. The relative content of main volatile organic compounds sourced from pineapple residue**

| No. | Time | Compounds                          | Formula                                       | Relative content<br>(%) |
|-----|------|------------------------------------|-----------------------------------------------|-------------------------|
| 1   | 2.14 | Acetic acid                        | C <sub>2</sub> H <sub>4</sub> O <sub>2</sub>  | 8.60±0.28               |
| 2   | 2.31 | Methyl ethanoate                   | C <sub>3</sub> H <sub>6</sub> O <sub>2</sub>  | 12.46±0.40              |
| 3   | 2.32 | Acetyl ether                       | C <sub>4</sub> H <sub>6</sub> O <sub>3</sub>  | 30.41±0.97              |
| 4   | 2.72 | 2-Heptynoic acid                   | C <sub>7</sub> H <sub>10</sub> O <sub>2</sub> | 1.56±0.05               |
| 5   | 2.82 | 1-Acetoxy-2-butanone               | C <sub>6</sub> H <sub>10</sub> O <sub>3</sub> | 6.27±0.20               |
| 6   | 2.91 | Succindialdehyde                   | C <sub>4</sub> H <sub>6</sub> O <sub>2</sub>  | 3.02±0.10               |
| 7   | 3.35 | Furfural                           | C <sub>5</sub> H <sub>4</sub> O <sub>2</sub>  | 8.21±0.26               |
| 8   | 3.50 | Furfuryl alcohol                   | C <sub>5</sub> H <sub>6</sub> O <sub>2</sub>  | 2.33±0.07               |
| 9   | 3.60 | Acetonyl acetate                   | C <sub>5</sub> H <sub>8</sub> O <sub>3</sub>  | 4.03±0.13               |
| 10  | 4.07 | 2-Methyl-2-cyclopenten-1-one       | C <sub>6</sub> H <sub>8</sub> O               | 0.68±0.02               |
| 11  | 4.14 | Butyrolactone                      | C <sub>4</sub> H <sub>6</sub> O <sub>2</sub>  | 3.42±0.11               |
| 12  | 4.28 | 2-Cyclopenten-1-one, 2-hydroxy     | C <sub>5</sub> H <sub>6</sub> O <sub>2</sub>  | 3.07±0.10               |
| 13  | 4.71 | 1-Acetoxy-2-butanone               | C <sub>6</sub> H <sub>10</sub> O <sub>3</sub> | 0.88±0.03               |
| 14  | 4.80 | 3-Methyl-2-cyclopentenone          | C <sub>6</sub> H <sub>8</sub> O               | 0.43±0.01               |
| 15  | 4.94 | Phenol                             | C <sub>6</sub> H <sub>6</sub> O               | 1.65±0.05               |
| 16  | 5.29 | Tetrahydro-2-furanmethanol         | C <sub>5</sub> H <sub>10</sub> O <sub>2</sub> | 0.55±0.02               |
| 17  | 5.57 | 3-Methyl-1,2-cyclopentanedione     | C <sub>6</sub> H <sub>8</sub> O <sub>2</sub>  | 1.58±0.05               |
| 18  | 6.46 | 2-Methoxyphenol                    | C <sub>7</sub> H <sub>8</sub> O <sub>2</sub>  | 1.53±0.05               |
| 19  | 6.52 | 4-Ethyl-2-hydroxy-2-cyclopentenone | C <sub>7</sub> H <sub>10</sub> O <sub>2</sub> | 0.56±0.02               |
| 20  | 6.59 | Cyclopropyl carbinol               | C <sub>4</sub> H <sub>8</sub> O               | 3.97±0.13               |

|    |      |                               |                                               |           |
|----|------|-------------------------------|-----------------------------------------------|-----------|
| 21 | 6.85 | 2-Methyl-1,3-cyclohexanedione | C <sub>7</sub> H <sub>10</sub> O <sub>2</sub> | 0.59±0.02 |
| 22 | 8.28 | 2,3-Dihydro-1-benzofuran      | C <sub>8</sub> H <sub>8</sub> O               | 2.09±0.07 |
| 23 | 8.56 | 1,2,3-Propanetriol,1-acetate  | C <sub>5</sub> H <sub>10</sub> O <sub>4</sub> | 0.60±0.02 |
| 24 | 9.59 | 2-Methoxy-4-vinylphenol       | C <sub>9</sub> H <sub>10</sub> O <sub>2</sub> | 1.52±0.05 |

**Table S4. The relative content of main volatile organic compounds sourced from banana pseudo-stem**

| No. | Time  | Compounds                            | Formula                                       | Relative content (%) |
|-----|-------|--------------------------------------|-----------------------------------------------|----------------------|
| 1   | 2.10  | Acetic acid                          | C <sub>2</sub> H <sub>4</sub> O <sub>2</sub>  | 33.71±1.08           |
| 2   | 2.30  | Hydroxyacetone                       | C <sub>3</sub> H <sub>6</sub> O <sub>2</sub>  | 36.02±1.15           |
| 3   | 2.70  | 2-Heptynoic acid                     | C <sub>7</sub> H <sub>10</sub> O <sub>2</sub> | 0.56±0.02            |
| 4   | 2.81  | 3-Pentanone                          | C <sub>5</sub> H <sub>10</sub> O              | 3.47±0.11            |
| 5   | 2.91  | Methyl valeraldehyde                 | C <sub>6</sub> H <sub>12</sub> O              | 1.20±0.04            |
| 6   | 3.33  | Furfural                             | C <sub>5</sub> H <sub>4</sub> O <sub>2</sub>  | 6.17±0.20            |
| 7   | 3.50  | Methylenecyclopropanecarboxylic acid | C <sub>5</sub> H <sub>6</sub> O <sub>2</sub>  | 1.85±0.06            |
| 8   | 3.60  | 2-Propanone, 1-(acetyloxy)-          | C <sub>5</sub> H <sub>8</sub> O <sub>3</sub>  | 1.23±0.04            |
| 9   | 4.07  | 2-methylcyclopent-2-en-1-one         | C <sub>6</sub> H <sub>8</sub> O               | 0.69±0.02            |
| 10  | 4.15  | Butanoic acid,4-hydroxy-             | C <sub>4</sub> H <sub>8</sub> O <sub>3</sub>  | 2.92±0.09            |
| 11  | 4.27  | 2-Cyclopenten-1-one, 2-hydroxy       | C <sub>5</sub> H <sub>6</sub> O <sub>2</sub>  | 0.72±0.02            |
| 12  | 4.93  | Phenol                               | C <sub>6</sub> H <sub>6</sub> O               | 1.23±0.04            |
| 13  | 5.29  | Propanoic acid, 2-methyl-, anhydride | C <sub>8</sub> H <sub>14</sub> O <sub>3</sub> | 0.58±0.02            |
| 14  | 5.56  | 1,2-Cyclopentanedione, 3-methyl      | C <sub>6</sub> H <sub>8</sub> O <sub>2</sub>  | 1.22±0.04            |
| 15  | 6.45  | Phenol, 2-methoxy                    | C <sub>7</sub> H <sub>8</sub> O <sub>2</sub>  | 1.46±0.05            |
| 16  | 6.59  | Cyclopropyl carbinol                 | C <sub>4</sub> H <sub>8</sub> O               | 3.92±0.13            |
| 17  | 8.28  | Benzofuran, 2,3-dihydro              | C <sub>8</sub> H <sub>8</sub> O               | 1.40±0.04            |
| 18  | 9.59  | 2-Methoxy-4-vinylphenol              | C <sub>9</sub> H <sub>10</sub> O <sub>2</sub> | 0.77±0.02            |
| 19  | 10.06 | Phenol, 2,6-dimethoxy                | C <sub>8</sub> H <sub>10</sub> O <sub>3</sub> | 0.88±0.03            |
